# Supplementary material for: Diving behaviour of Cuvier's beaked whales exposed to two types of military sonar
Source: PubMed Central journal article supplement (PMC5579120; doi:10.1098/rsos.170629), 2017-08-30

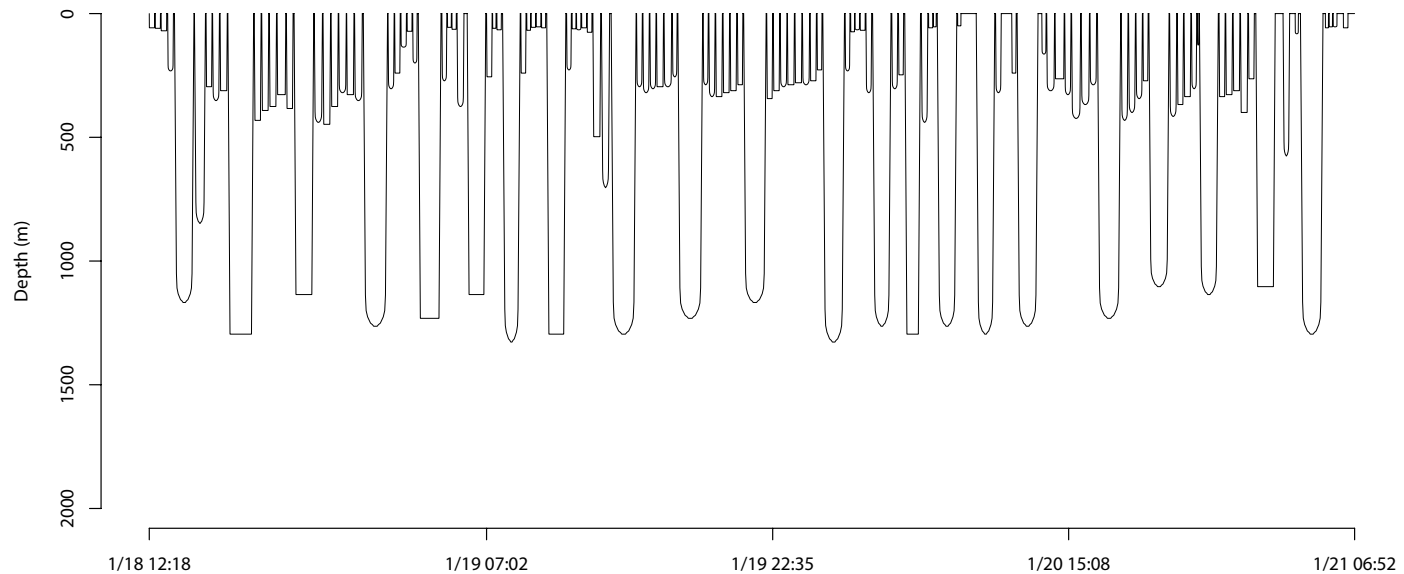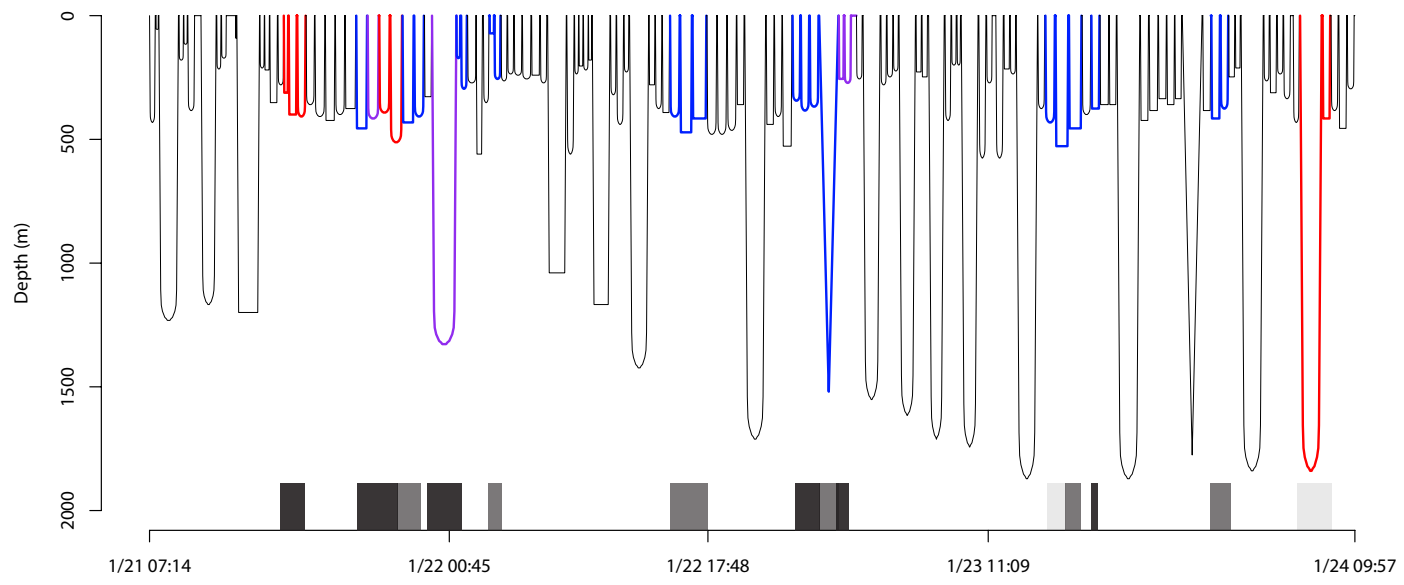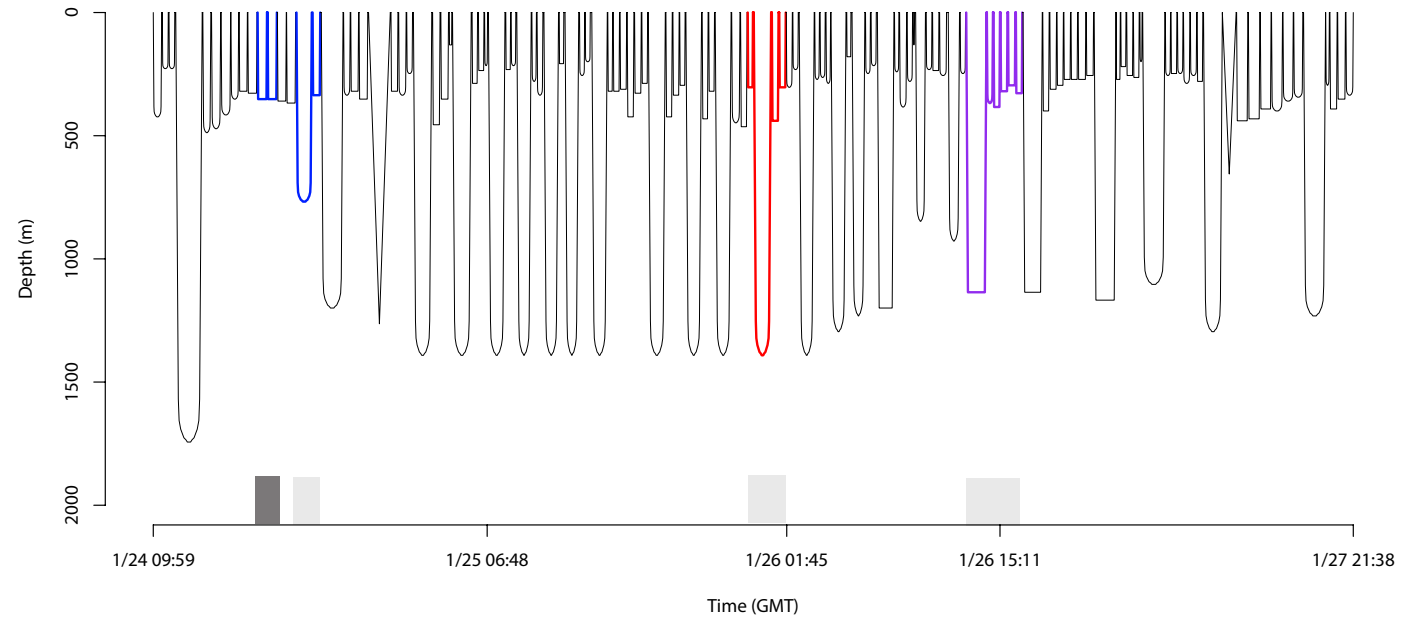

Supplement: rsos170629supp1.pdf [file rsos170629supp1.pdf]
